# Supplementary material for: Modulation of corticomotor excitability in response to distal focal cooling
Source: PeerJ. 2018 Dec 21;6:e6163. doi: 10.7717/peerj.6163 (PMC6305122; doi:10.7717/peerj.6163)
Supplement: Supplemental Information 1 — rMT, resting Motor Threshold; MD, Multi-digit; SD, single-digit; BL, Baseline; C1, 1-min during cooling; PC5, 5-min post-cooling; PC10, 10-min post-cooling; Lat, Latency; Temp, Skin temperature; Delta, Difference in skin temperature from baseline. [file peerj-06-6163-s001.xlsx]

## Sheet: Project 2 _FDI data_1
Participant				Stim Intensity		Motor Evoked Potentials Amplitude Data (µV)								Latency Data (ms)								Skin Temperature Data (°C)
Sub_ID	Age_Years	Age	Sex	rMT	test_Intensity	BL_MD	C1_MD	PC5_MD	PC10_MD	BL_SD	C1_SD	PC5_SD	PC10_SD	BL_MD	C1_MD	PC5_MD	PC10_MD	BL_SD	C1_SD	PC5_SD	PC10_SD	BL_MD	C1_MD	PC5_MD	PC10_MD	Delta_C1MD	BL_SD	C1_SD	PC5_SD	PC10_SD	Delta_C1SD
AY01	27	1	M	28	37	2235.8	1744.4	1899.2	1600	4386.8	3818.9	2645	3749.8	25.5	25.5	25.5	25.5	24.5	24	24	24.5	33.2	21	32	32.5	-12.2	32.5	18.5	32	32	-14
AY02	26	1	M	48	62	772.8	545.2	601.6	659.7	659.9	640.9	1010.3	865.2	22	24	24	23	23	23	23	22	30.4	17	30.4	32	-13.4	35	24	35	35	-11
AY04	22	1	F	27	35	2229.2	2231.9	2949.7	2715.3	1275.6	1188.7	1661.1	1407	21	21	21	24.5	20.5	20	21	21.5	33.1	21	23	26	-12.1	34	20	22	26.5	-14
AY05	30	1	M	36	47	2604.7	3247.8	4494.1	3270.8	3248	3824.7	3730.7	3352.8	24	24	24.5	24.5	24	23.5	23	24	30.5	21	23.8	26.3	-9.5	30	18	29	32.3	-12
AY06	34	1	M	45	58	2328.6	1909.9	1806.6	2006.3	3593.3	2203.9	4231.7	2409.4	24.5	24.5	24.5	24.5	24.5	24.5	24	24.5	30	20	25	30.4	-10	28	16	23	30	-12
AY07	34	1	F	34	45	271.7	220.9	245.6	159.7	317.1	128.9	112.1	92.3	19.5	22	21	22	19.5	21	20	22	32	19	33	31.5	-13	34	23	32	32	-11
AY08	36	1	M	33	43	1162.6	3837.9	2076.9	2640.1	1847.7	3396	1435.5	1052.2	24	24.5	25.5	25.5	21	24.5	24.5	24.5	30	21	28	28.2	-9	34	25	29.1	31.9	-9
AY09	28	1	F	60	78	2143.1	1319.8	1357.9	1687.7	1223.6	996.6	1092.8	1062	21	22	22	23	18.5	19.5	20	20	26.5	14.2	20.5	26	-12.3	32	26	26	32	-6
AY11	28	1	M	41	53	1750.7	2256.6	2560.1	2260.3	1033	2265.1	1079.1	937.7	22	23	23.5	22.5	21	22	22	23	30.6	18.5	21.1	26.7	-12.1	31	20	31	31.9	-11
AY17	28	1	F	37	48	5249.5	3798.3	2956.1	2201.8	2552.5	2461.2	2598.6	2071.8	22.5	23.5	24.5	22.5	22	22.5	22.5	22	26	18.4	21	23	-7.6	33	18.6	27.8	33.6	-14.4
AY18	30	1	F	39	52	1184.2	1285.6	865.2	1482.7	1636.2	1932.6	1497.3	1750.5	23.5	23.5	24.5	23.5	24.5	23	23	23	25	18	22	25	-7	30.5	22.4	26	31.6	-8.1
AY19	29	1	M	42	54	1418.2	1924.1	1885	2101.6	1394.8	2196.2	2613.5	1846.9	23	23	23	23	24.5	23	24	24.5	32	21	32.5	33	-11	31.5	18.5	24.2	28.1	-13
AY20	37	1	M	54	69	1280	1386.2	1469	1729.7	1155	656.5	1633.1	2645.3	24.4	26.5	26.5	27	25.5	27.5	26.5	26.5	28	18	28	31	-10	28.8	15.5	21.1	23.8	-13.3
BS02	67	2	F	52	68	4352.3	2216.6	2798.1	2666.3	3327.9	2758.3	5452.1	2652	20	22.5	22.5	22.5	21	22.5	21.5	22.5	33.3	24.5	24.3	32.9	-8.8	33	24	29.6	31	-9
BS03	65	2	F	39	51	1138.4	2292.5	1296.6	1436.1	619.4	450	710.4	572.8	24	23	23	24	24.5	24	24	24	31	21.3	28.8	29.2	-9.7	30.4	20.2	24	29.4	-10.2
BS04	75	2	F	58	76	979.2	901.4	2926.8	4033.2	1279.3	1718.5	2408.2	1715.8	23.5	23.5	23.5	23.5	24.5	22	23	24.6	31.6	21.3	22.1	24.5	-10.3	29	20.8	20.7	25.8	-8.2
BS05	71	2	M	58	75	1485.1	1687.7	581.8	578.4	2076.2	2856.2	2425.3	1082.3	25	25.5	24.5	23.5	24.5	24.5	24.5	26	25.8	19	28.1	29.1	-6.8	34	24.5	31.5	32.7	-9.5
BS06	69	2	F	69	89	475.1	432.6	561	620.4	1082.3	454.1	1046.6	835.9	25.5	23.5	24.5	24.5	24.5	24.5	24	24	31.4	23.3	22.4	30.7	-8.1	32	22	22.4	29.4	-10
BS09	59	2	F	51	67	5624.5	4422.4	4566.9	4541.3	5560.1	4254.4	5018.6	5368.4	21.5	22.5	23	23	22.5	22.5	23.5	24.5	31	19.4	24.5	26.5	-11.6	26	13.1	22.9	25.5	-12.9
BS10	65	2	F	37	49	181.7	767.9	727.1	698.7	254.2	399.2	768.6	339.6	25.5	25	25	25	23	24.5	23	23	25.2	13.3	23.1	25.9	-11.9	32	24.4	25	28.5	-7.6
BS11	68	2	F	47	62	1147.7	679.2	1519.8	1508.5	2296.4	1853.3	2527.8	3455.6	24.5	24.5	24	24.5	23.5	23.5	23.5	22.5	30.2	17	26.3	30.2	-13.2	32	23	25	28.5	-9
BS15	70	2	M	71	89	275.4	288.6	145.8	219.5	530.9	787.4	881.2	513.7	26.5	27.5	29	29	28	30	27.5	30	33.4	26.6	32.6	33.8	-6.8	32.5	16.5	30.8	33.6	-16
rMT: resting Motor Threshold
MD: Multi-digit
SD: single-digit
BL: Baseline
C1: 1-min during cooling
PC5: 5-min post-cooling
PC10: 10-min post-cooling
Lat: Latency
Temp: Skin temperature
Delta: Difference in skin temperature from baseline
